# Supplementary material
Source: PubMed Central journal article supplement (PMC8646520)

**Summary :**

- 1- **Figure S1: Comparative meta-analysis of standardized mean difference of ALT in Covid-19 patients with 95% CI**
- 2- **Figure S2: Comparative meta-analysis of standardized mean difference of AST in Covid-19 patients with 95% CI**
- 3- **Figure S3: Comparative meta-analysis of odds ratios of cardiovascular disease in Covid-19 patients with 95% CI**
- 4- **Figure S4: Comparative meta-analysis of odds ratios of cough in Covid-19 patients with 95% CI**
- 5- **Figure S5: Comparative meta-analysis of standardized mean difference of creatinine in Covid-19 patients with 95% CI**
- 6- **Figure S6: Comparative meta-analysis of standardized mean difference of CRP in Covid-19 patients with 95% CI**
- 7- **Figure S7: Comparative meta-analysis of standardized mean difference of d-dimer in Covid-19 patients with 95% CI**
- 8- **Figure S8: Comparative meta-analysis of odds ratios of diabetes in Covid-19 patients with 95% CI**
- 9- **Figure S9: Comparative meta-analysis of odds ratios of dyspnea in Covid-19 patients with 95% CI**
- 10- **Figure S10: Comparative meta-analysis of odds ratios of diarrhea in Covid-19 patients with 95% CI**
- 11- **Figure S11: Comparative meta-analysis of odds ratios of fatigue in Covid-19 patients with 95% CI**
- 12- **Figure S12: Comparative meta-analysis of odds ratios of fever in Covid-19 patients with 95% CI**
- 13- **Figure S13: Comparative meta-analysis of odds ratios of hypertension in Covid-19 patients with 95% CI**
- 14- **Figure S14: Comparative meta-analysis of standardized mean difference of LDH in Covid-19 patients with 95% CI**
- 15- **Figure S15: Comparative meta-analysis of standardized mean difference of lymphocytic count in Covid-19 patients with 95% CI**
- 16- **Figure S16: Comparative meta-analysis of standardized mean difference of neutrophilic count in Covid-19 patients with 95% CI**
- 17- **Figure S17: Comparative meta-analysis of standardized mean difference of neutrophilic count in Covid-19 patients with 95% CI**
- 18- **Figure S18: Comparative meta-analysis of standardized mean difference of WBCs counts in Covid-19 patients with 95% CI**
- 19- **Figure S19: Comparative meta-analysis of standardized mean difference of platelet counts in Covid-19 patients with 95% CI**
- 20- **Figure S20: Comparative meta-analysis of standardized mean difference of urea in Covid-19 patients with 95% CI**

**Figure S1: Comparative meta-analysis of standardized mean difference of ALT in Covid-19 patients with 95% CI**

**A) Favors mild-moderate vs severe-critical**

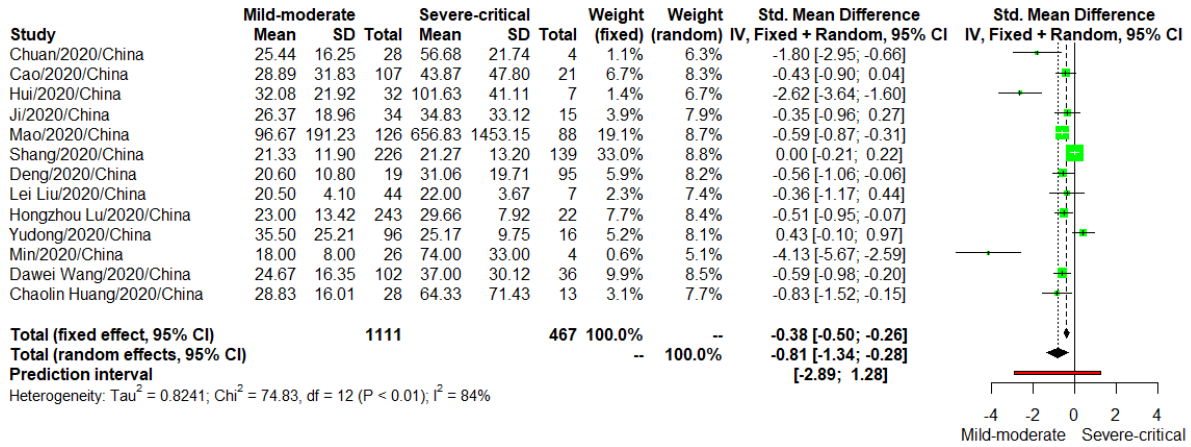

**B) Favors survivor vs non-survivor**

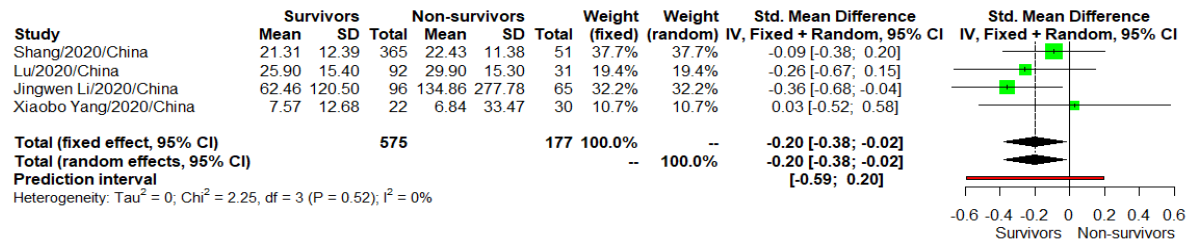

**Figure S2: Comparative meta-analysis of standardized mean difference of AST in Covid-19 patients with 95% CI**

**A) Favors mild-moderate vs severe-critical**

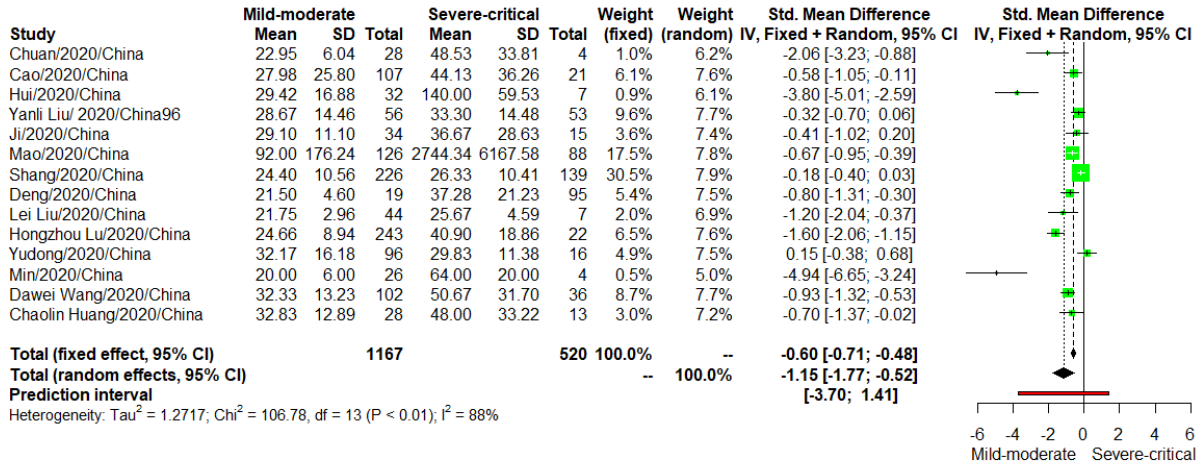

**B) Favors survivor vs non-survivor**

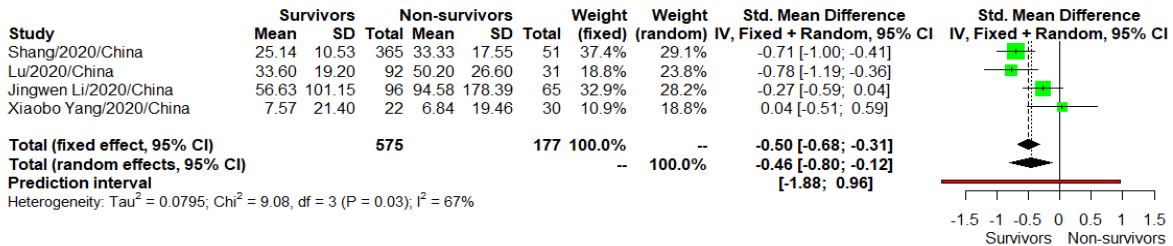

**Figure S3: Comparative meta-analysis of odds ratios of cardiovascular disease in Covid-19 patients with 95% CI**

**A) Favors mild-moderate vs severe-critical**

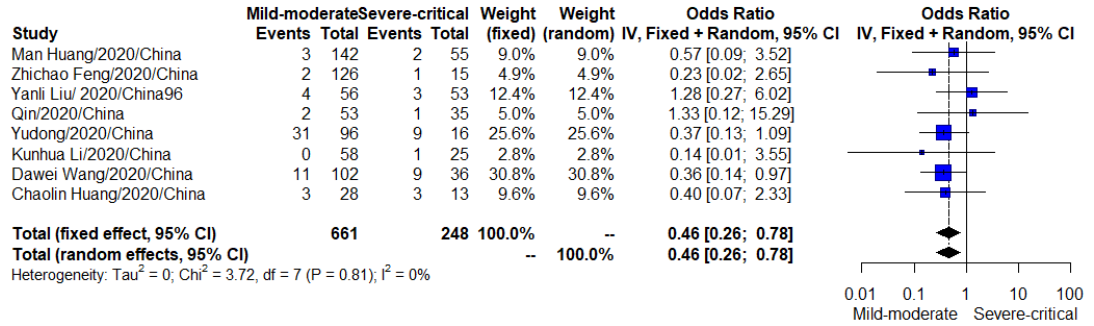

**B) Favors survivor vs non-survivor**

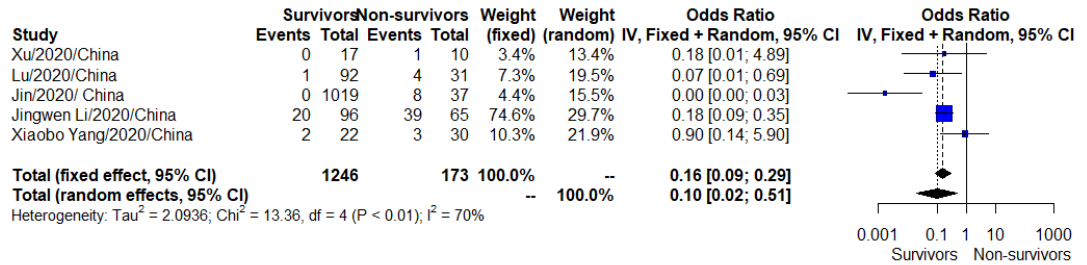

Figure S4: Comparative meta-analysis of odds ratios of cough in Covid-19 patients with 95% CI

A) Favors mild-moderate vs severe-critical

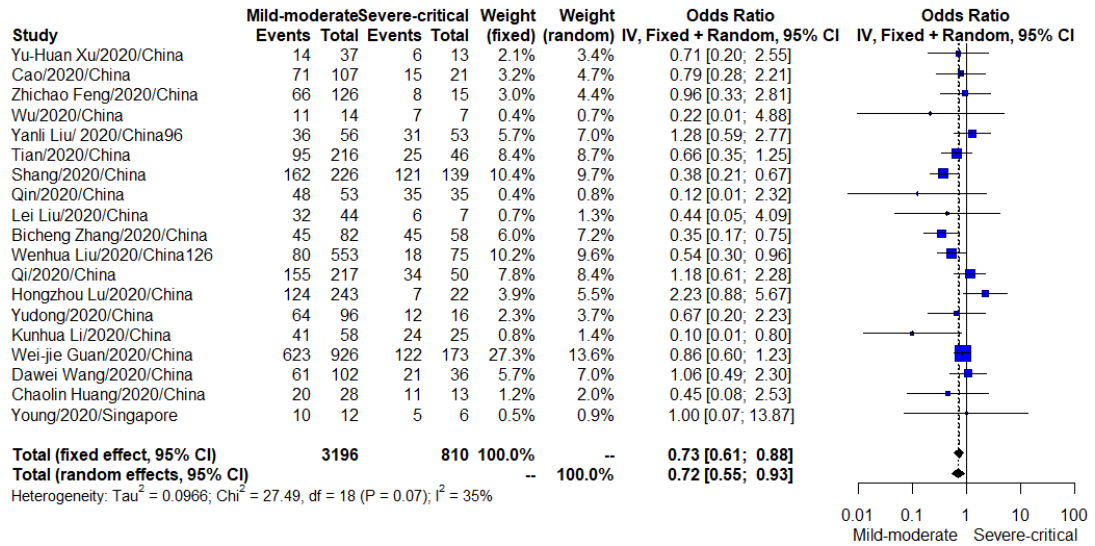

B) Favors survivor vs non-survivor

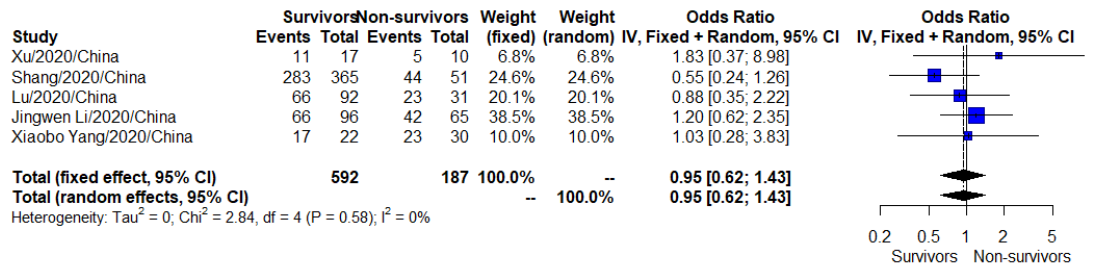

**Figure S5: Comparative meta-analysis of standardized mean difference of creatinine in Covid-19 patients with 95% CI**

**A) Favors mild-moderate vs severe-critical**

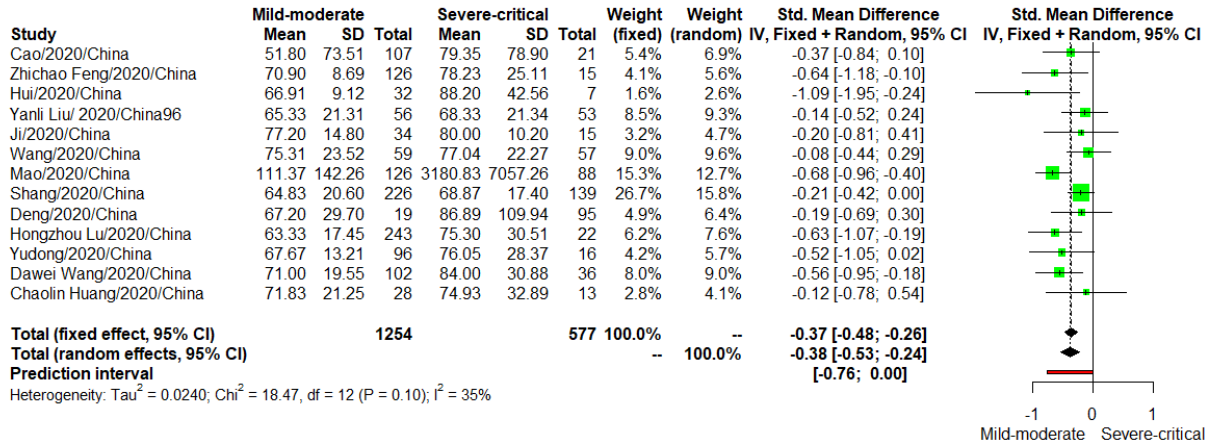

**B) Favors survivor vs non-survivor**

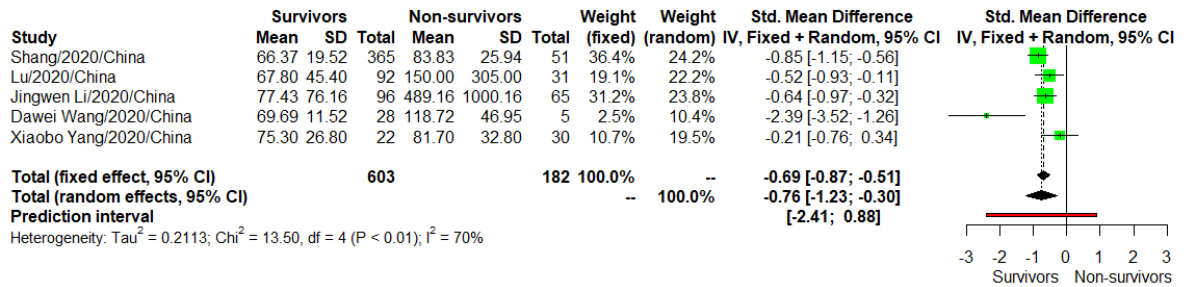

**Figure S6: Comparative meta-analysis of standardized mean difference of CRP in Covid-19 patients with 95% CI**

**A) Favors mild-moderate vs severe-critical**

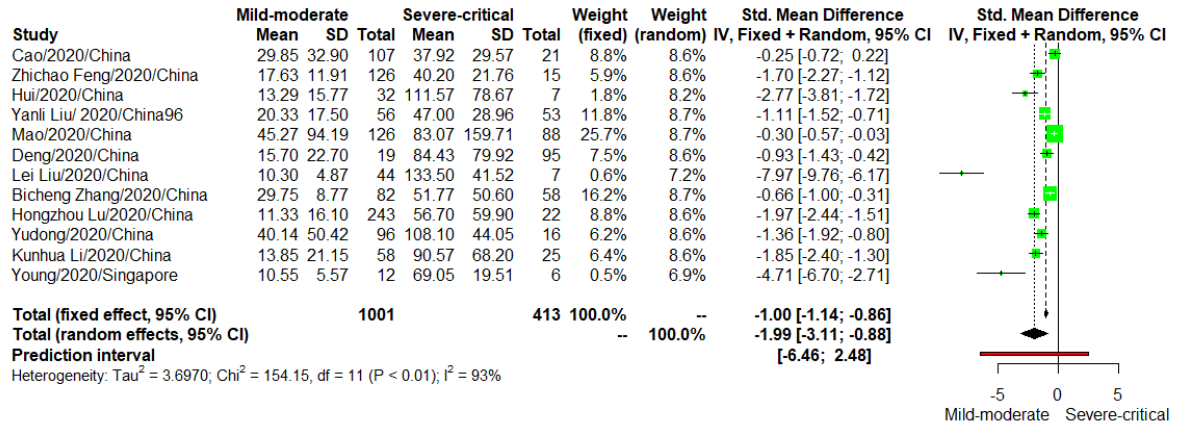

**B) Favors survivor vs non-survivor**

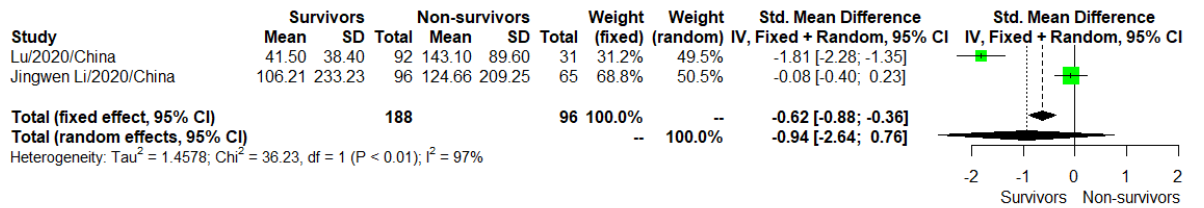

**Figure S7: Comparative meta-analysis of standardized mean difference of d-dimer in Covid-19 patients with 95% CI**

**A) Favors mild-moderate vs severe-critical**

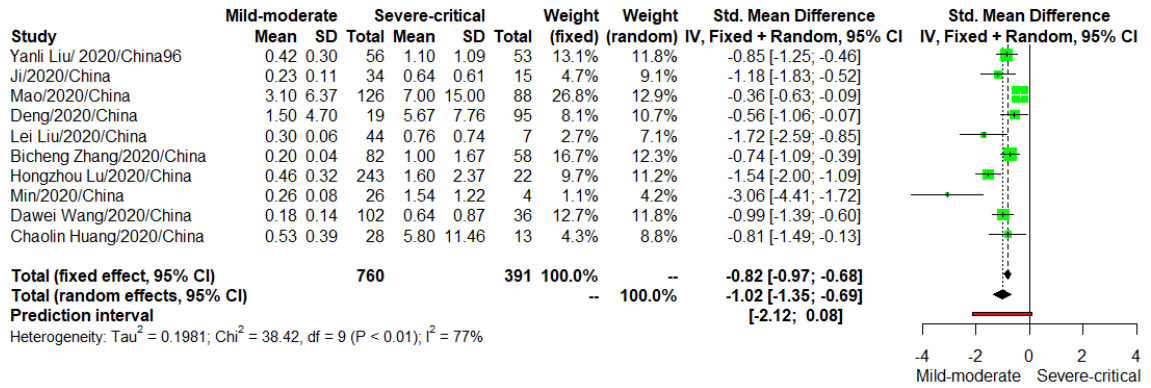

**B) Favors Survivor vs non-survivor**

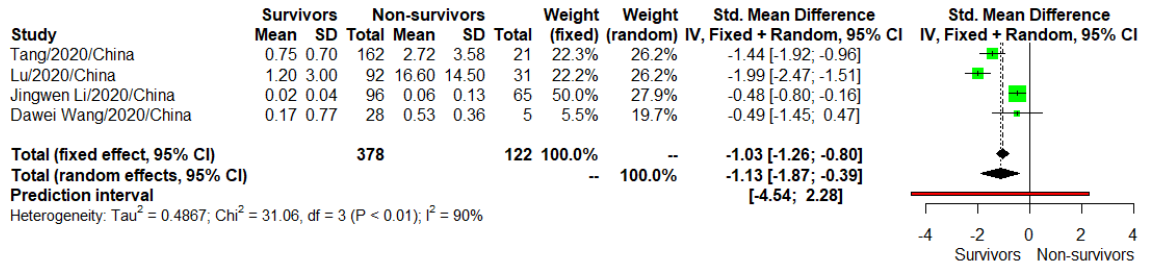



**Figure S8: Comparative meta-analysis of odds ratios of diabetes in Covid-19 patients with 95% CI**

**A) Favors mild-moderate vs severe-critical**

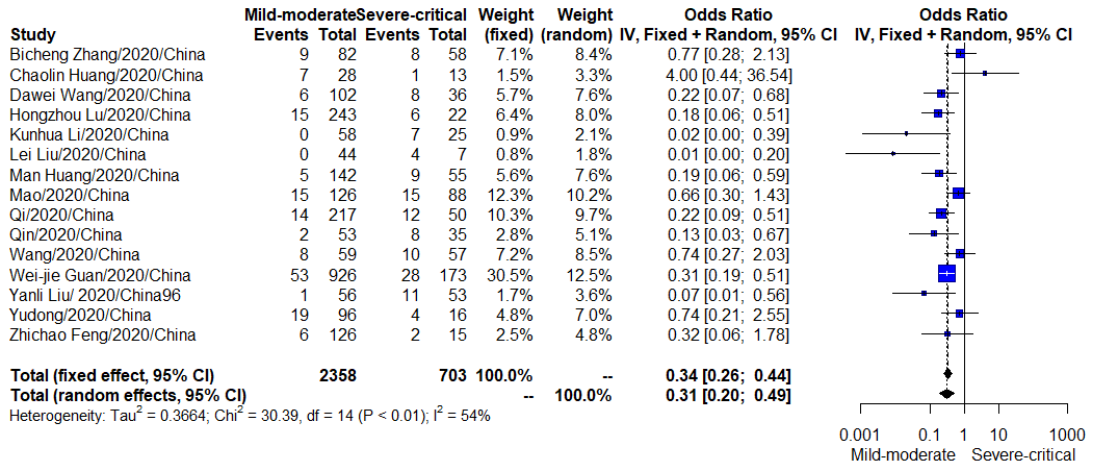

**B) Favors survivor vs non-survivor**

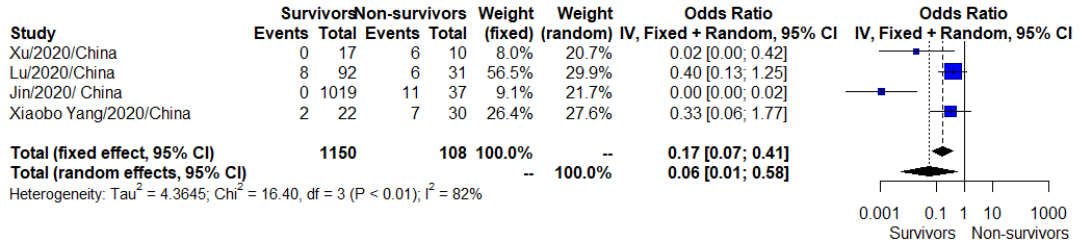

Figure S9: Comparative meta-analysis of odds ratios of dyspnea in Covid-19 patients with 95% CI

A) Favors mild-moderate vs severe-critical

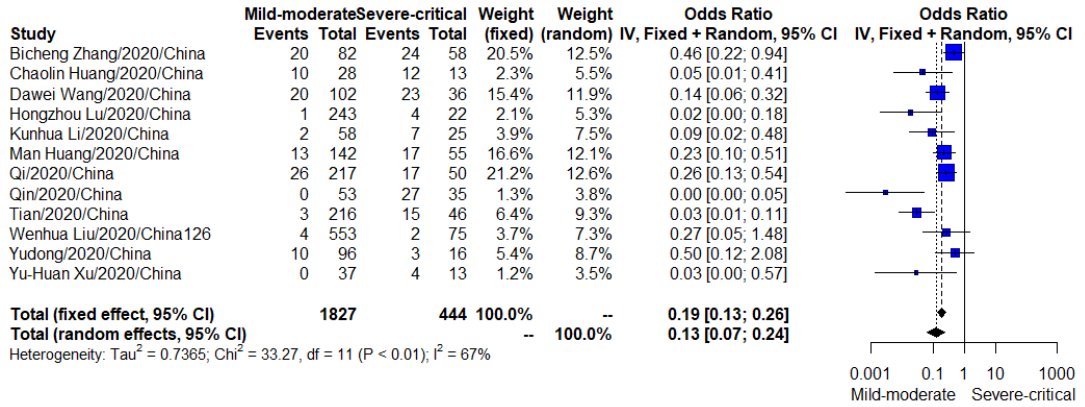

B) Favors survivor vs non-survivor

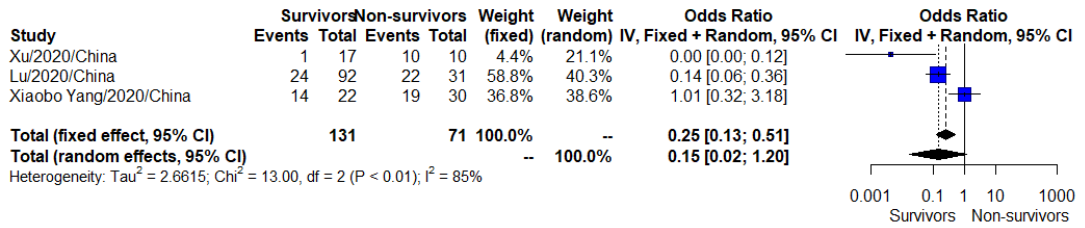

**Figure S10: Comparative meta-analysis of odds ratios of diarrhea in Covid-19 patients with 95% CI**

**A) Favors mild-moderate vs severe-critical**

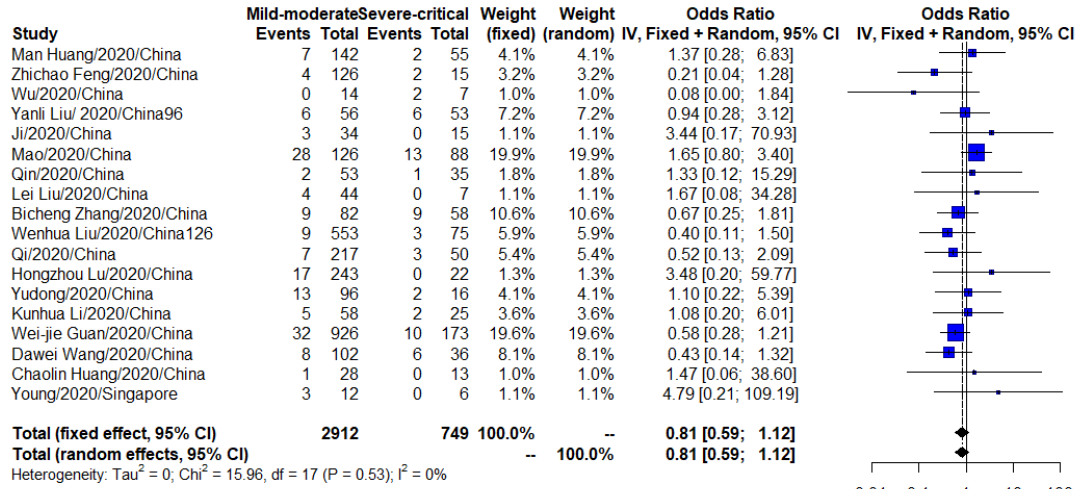

**B) Favors survivor vs non-survivor**

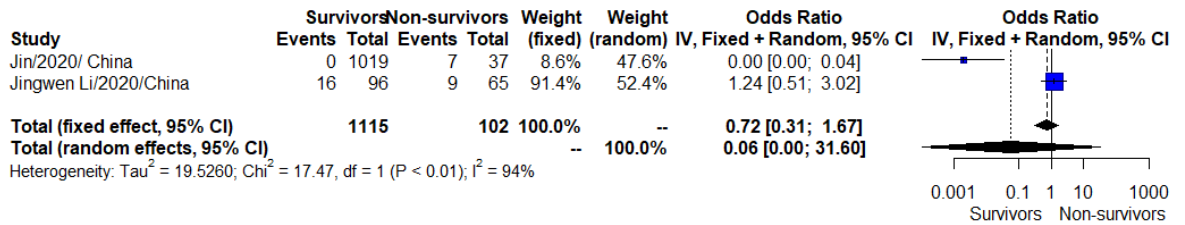

Figure S11: Comparative meta-analysis of odds ratios of fatigue in Covid-19 patients with 95% CI

A) Favors mild-moderate vs severe-critical

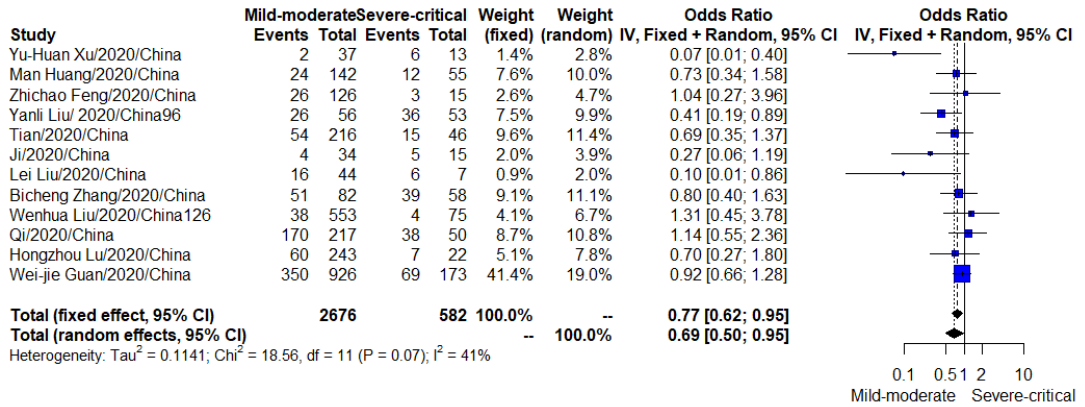

B) Favors survivor vs non-survivor

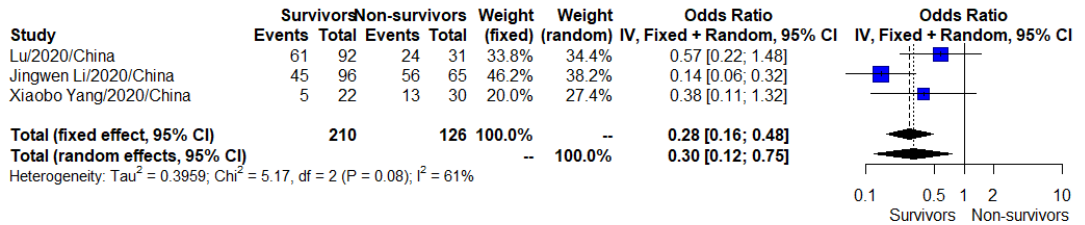

Figure S12: Comparative meta-analysis of odds ratios of fever in Covid-19 patients with 95% CI

A) Favors mild-moderate vs severe-critical

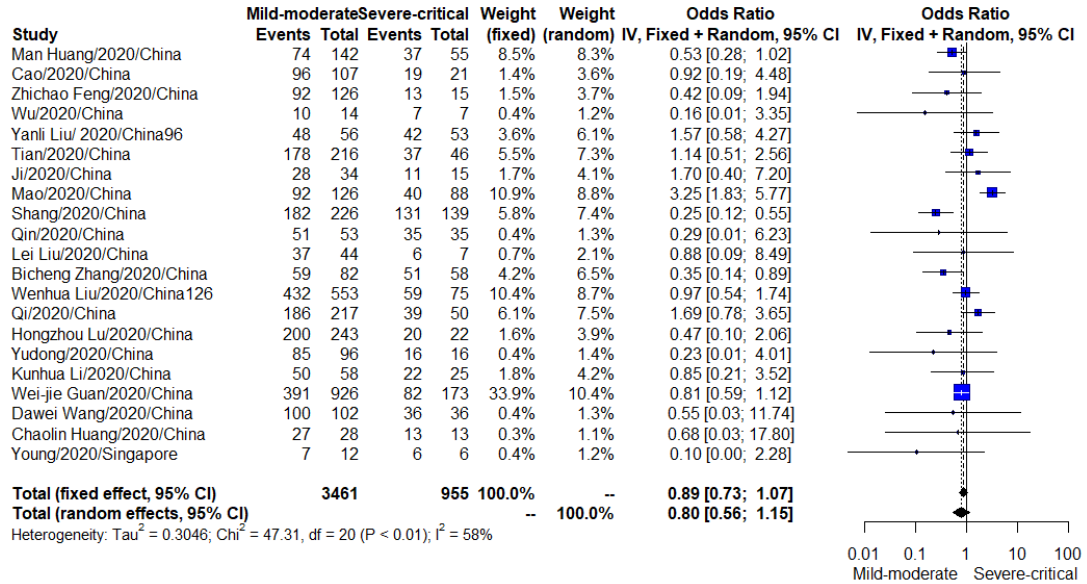

B) Favors survivor vs non-survivor

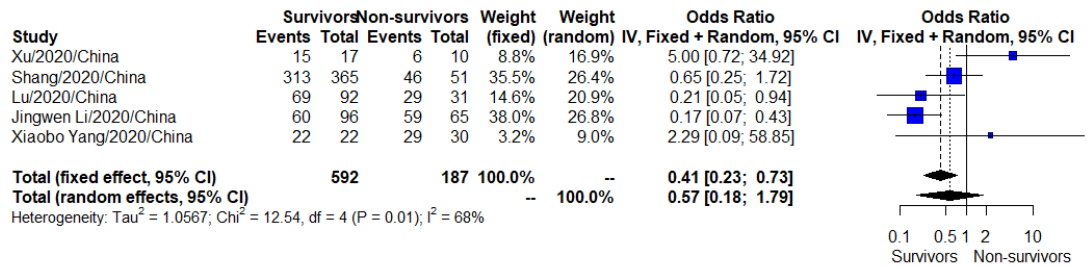

**Figure S13: Comparative meta-analysis of odds ratios of hypertension in Covid-19 patients with 95% CI**

**A) Favors mild-moderate vs severe-critical**

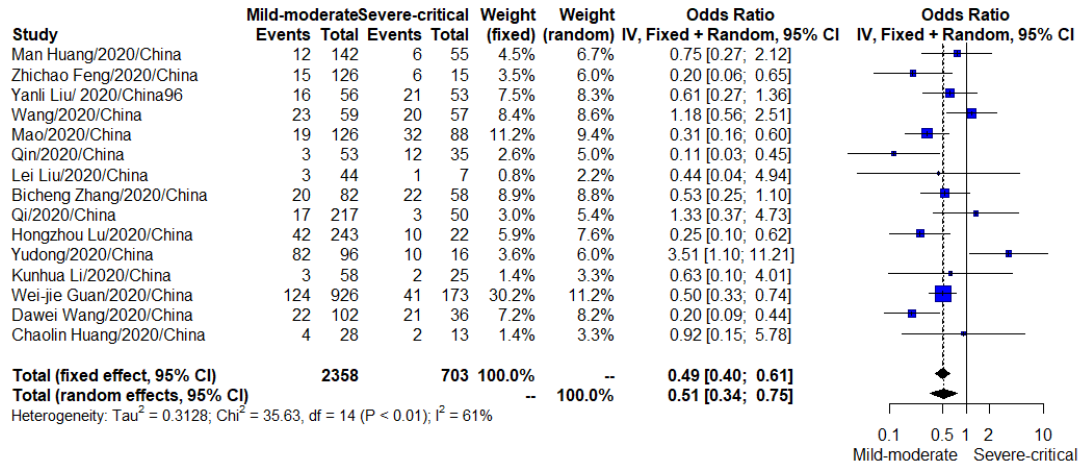

**B) Favors survivor vs non-survivor**

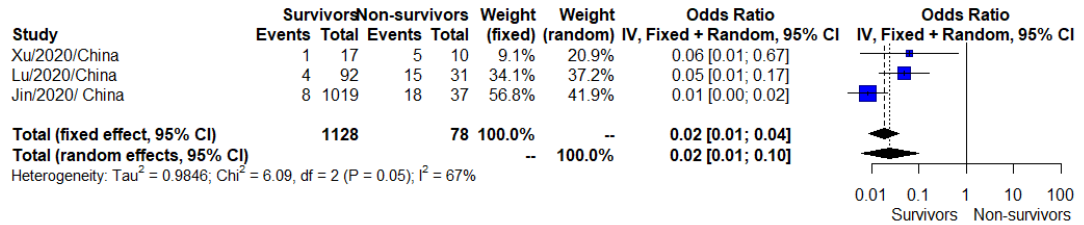

**Figure S14: Comparative meta-analysis of standardized mean difference of LDH in Covid-19 patients with 95% CI**

**A) Favors mild-moderate vs severe-critical**

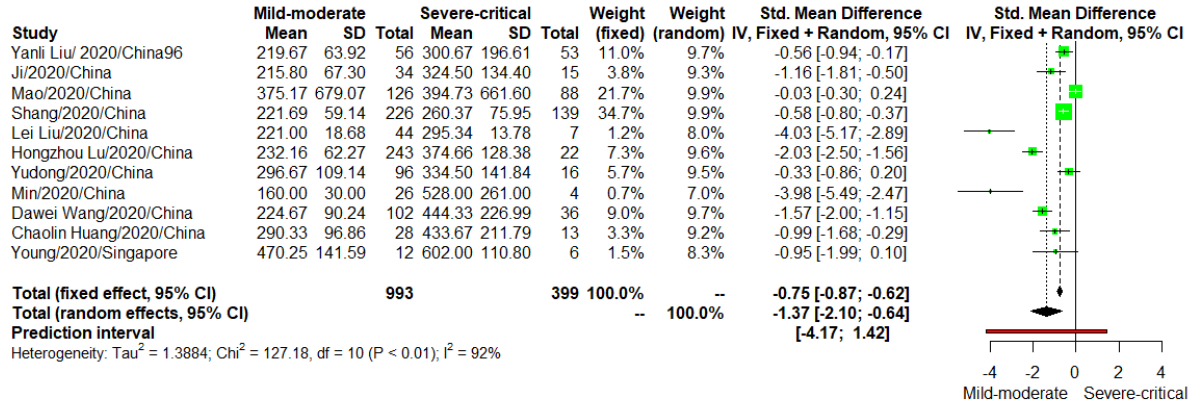

**B) Favors survivor vs non-survivor**

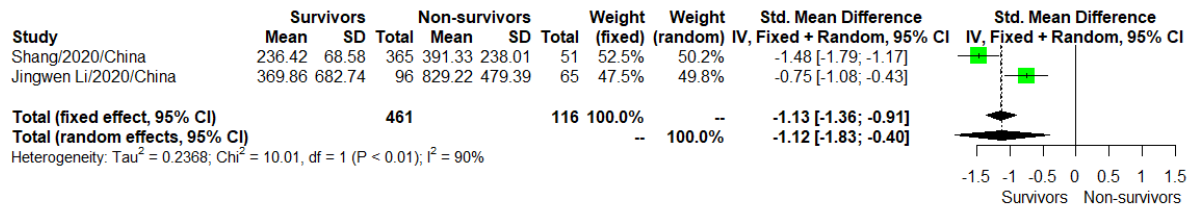

**Figure S15: Comparative meta-analysis of standardized mean difference of lymphocytic count in Covid-19 patients with 95% CI**

**A) Favors severe-critical vs mild-moderate**

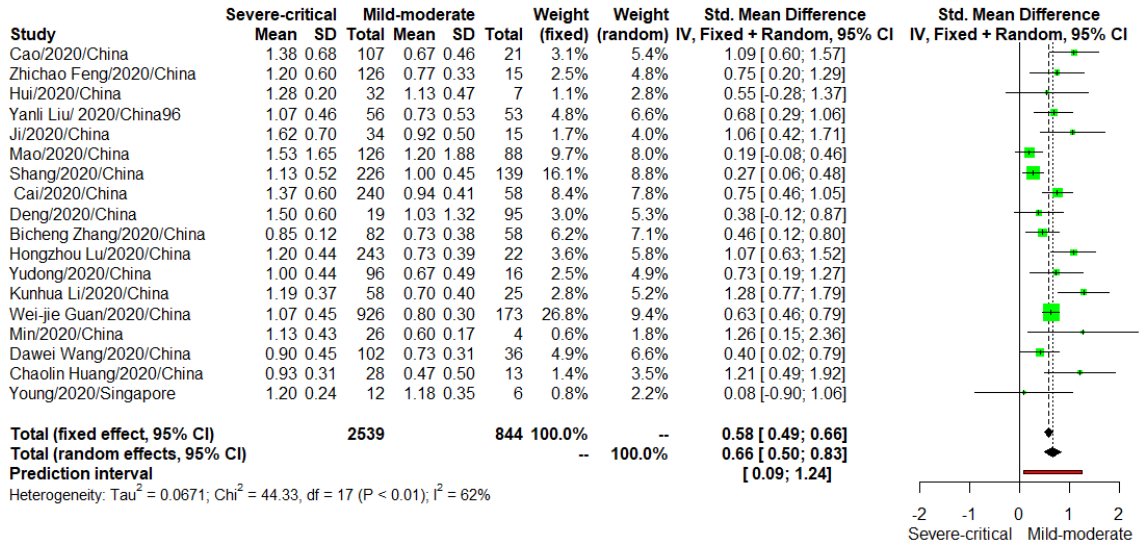

**B) Favors non-survivor vs survivor**

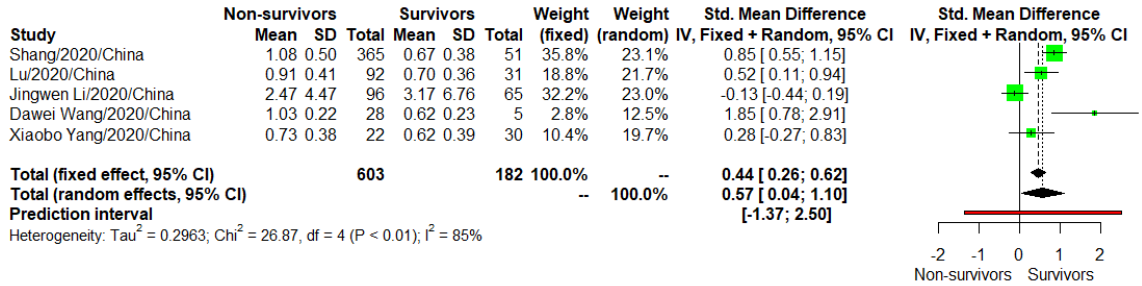



**Figure S16: Comparative meta-analysis of standardized mean difference of neutrophilic count in Covid-19 patients with 95% CI**

**A) Favors mild-moderate vs severe-critical**

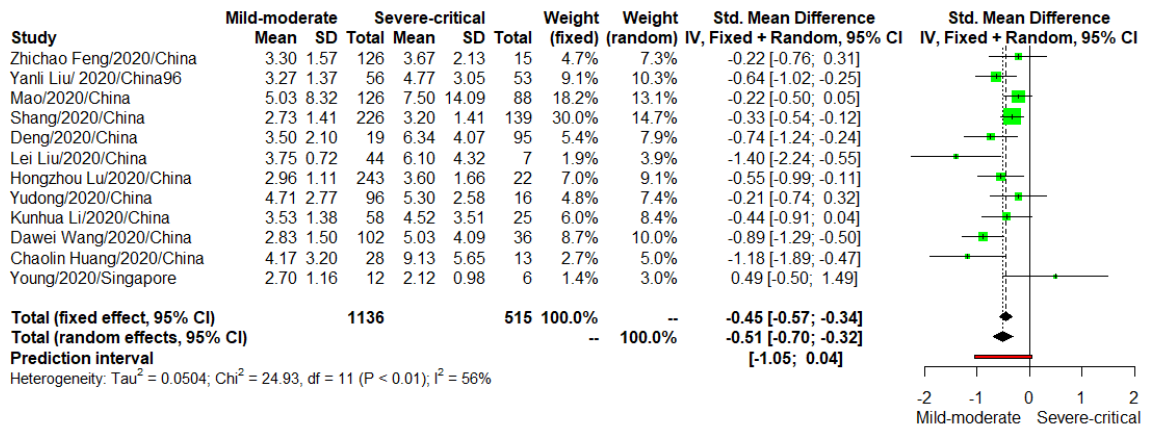

**B) Favors survivor vs non-survivor**

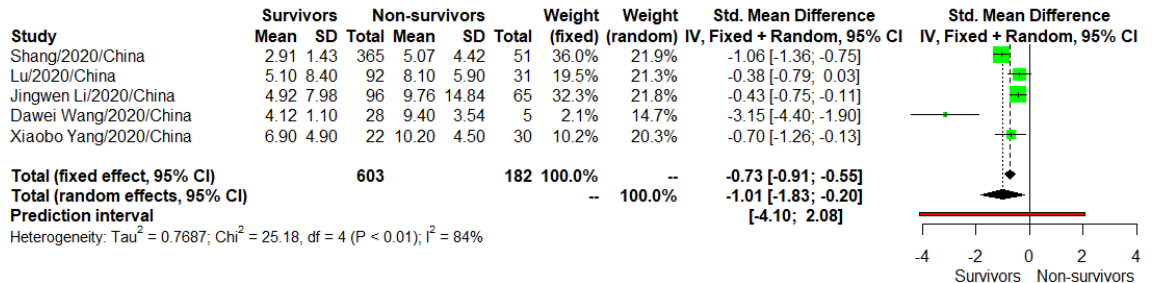

**Figure S17: Comparative meta-analysis of standardized mean difference of neutrophilic count in Covid-19 patients with 95% CI**

**A) Favors mild-moderate vs severe-critical**



**B) Favors survivor vs non-survivor**

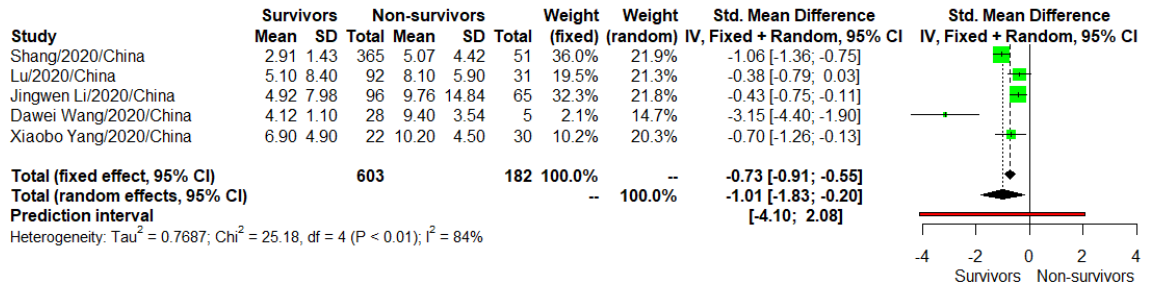

**Figure S18: Comparative meta-analysis of standardized mean difference of WBCs counts in Covid-19 patients with 95% CI**

**A) Favors mild-moderate vs severe-critical**

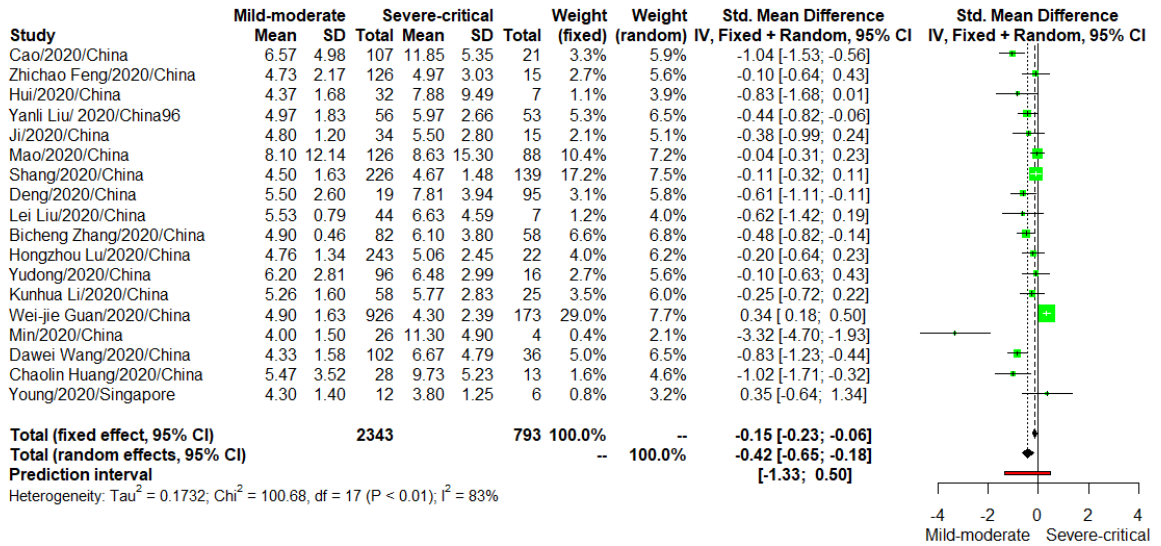

**B) Favors survivor vs non-survivor**

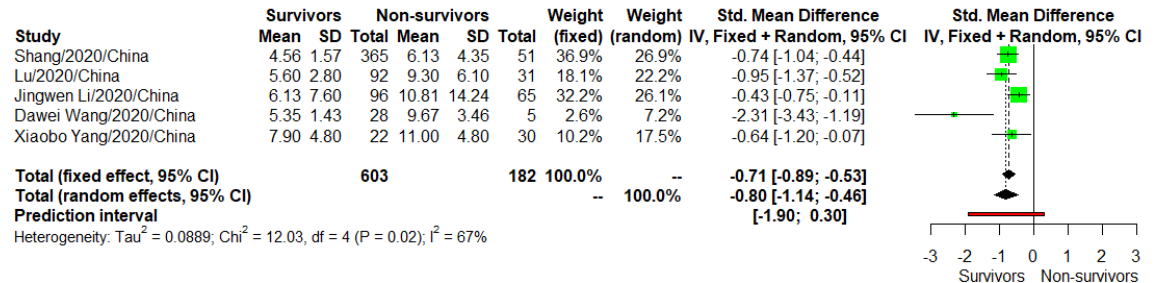

**Figure S19: Comparative meta-analysis of standardized mean difference of platelet counts in Covid-19 patients with 95% CI**

**A) Favors severe-critical vs mild-moderate**

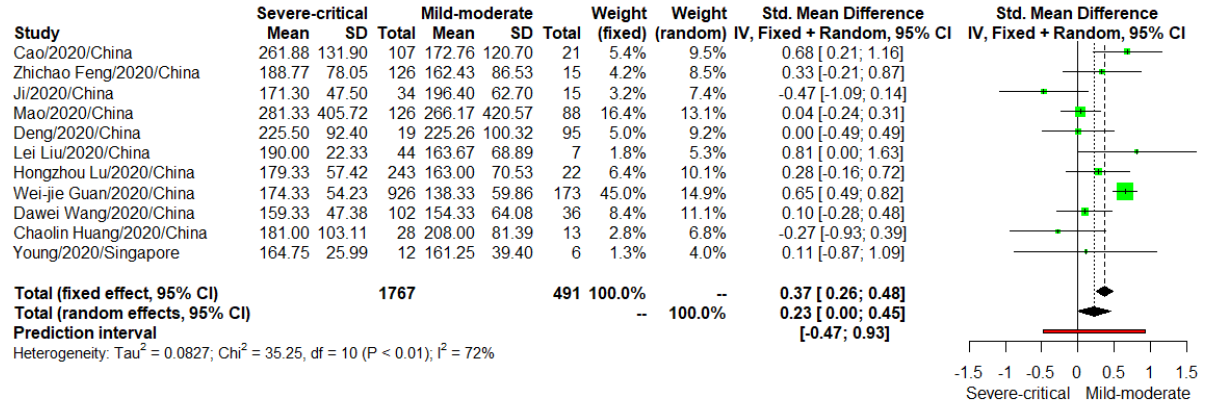

**B) Favors non-survivor vs survivor**

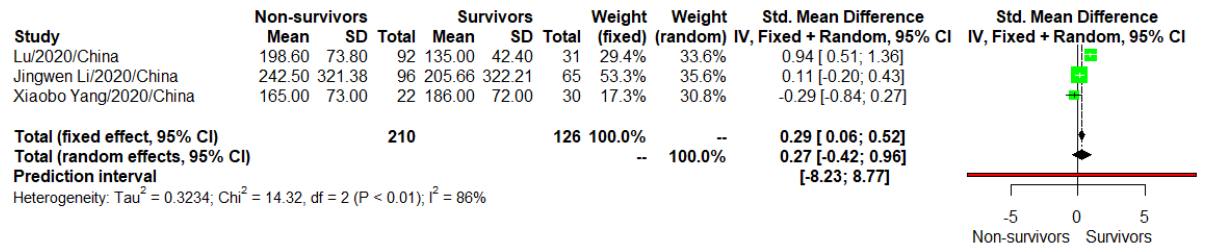

**Figure S20: Comparative meta-analysis of standardized mean difference of urea in Covid-19 patients with 95% CI**

**A) Favors mild-moderate vs severe-critical**

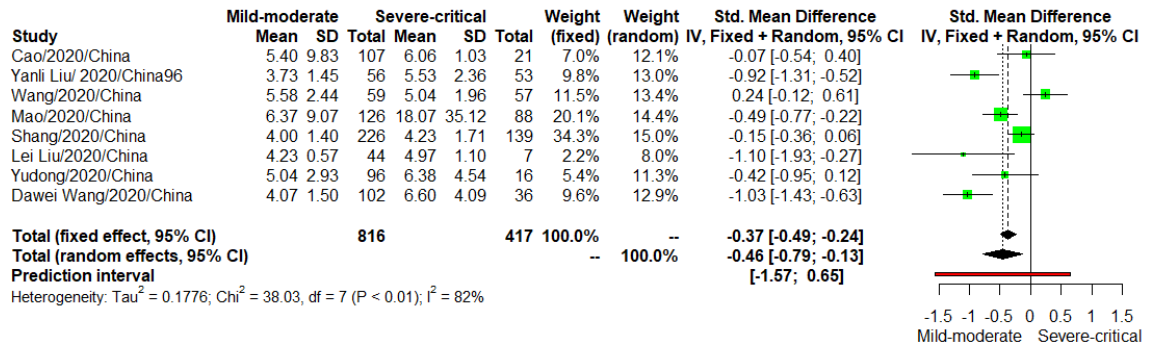

**B) Favors survivor vs non-survivor**

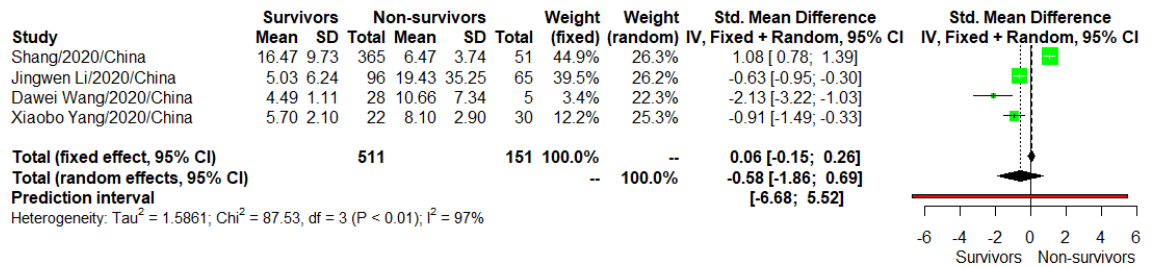

Supplement: RMV-31-e2288-s003.pdf [file RMV-31-e2288-s003.pdf]
